# Supplementary material
Source: MDPI journal article supplement (https://www.mdpi.com/2313-4321/3/4/55)
Supplement: s1 [file s1]

**Table S1.** The Swing Questionnaire: points given to each scenario were used in the calculation of the stakeholder's preference weight for the objective pointed by an arrow in the respective scenario.

### SELECTING ORGANIC WASTE TREATMENT TECHNOLOGY FOR LIMBE MARKET

|                     |              |                                         |
|---------------------|--------------|-----------------------------------------|
| <b>Swing-Method</b> | Name:        | Interviewer: <b>Wrixon Mpanang'ombe</b> |
|                     | Stakeholder: | Date:                                   |

**Worst Scenario:**

Points:

|                                                                                   |                                                       |                                                                                                                                                                |                                                                                                                                 |                                                                   |                                                                                                                                                                                              |   |
|-----------------------------------------------------------------------------------|-------------------------------------------------------|----------------------------------------------------------------------------------------------------------------------------------------------------------------|---------------------------------------------------------------------------------------------------------------------------------|-------------------------------------------------------------------|----------------------------------------------------------------------------------------------------------------------------------------------------------------------------------------------|---|
|  |                                                       |                                                                                                                                                                |                                                                                                                                 |                                                                   |                                                                                                                                                                                              | 0 |
|                                                                                   | <b>Technical reliability</b><br>90 days/year downtime | <b>Social Acceptance</b><br>10/10 Potential hazards<br><br>All week bad smell 20 m far from plant<br><br>1 worker/ton<br><br>0% of successful past experiences | <b>Hygiene and health protection</b><br><br>1% of collected organic waste can be treated<br><br>20% wet waste weight as residue | <b>Economic sustainability</b><br><br>0 income- expenditure ratio | <b>Environmental protection</b><br><br>2700 kg CO <sub>2</sub> equivalent/ton<br><br>5/5 leachate risk<br><br>0% N recovered<br><br>0% Phosphorus recovered<br><br>0 kWh/ton energy produced |   |
|  |                                                       |                                                                                                                                                                |                                                                                                                                 |                                                                   |                                                                                                                                                                                              |   |

Scenario:

Points:

|                                                                             |              |                                                                                                                                                                                        |                                                                                                                                             |                                                                           |                                                                                                                                                                                                                     |
|-----------------------------------------------------------------------------|--------------|----------------------------------------------------------------------------------------------------------------------------------------------------------------------------------------|---------------------------------------------------------------------------------------------------------------------------------------------|---------------------------------------------------------------------------|---------------------------------------------------------------------------------------------------------------------------------------------------------------------------------------------------------------------|
| <div>Technical reliability</div> <div>0 day/year downtime</div> <div></div> |              |                                                                                                                                                                                        |                                                                                                                                             |                                                                           |                                                                                                                                                                                                                     |
| <div></div>                                                                 | <div>↑</div> | <div>Social Acceptance</div> <div>10/10 Potential hazards</div> <div>All week bad smell 20 m far from plant</div> <div>1 worker/ton</div> <div>0% of successful past experiences</div> | <div>Hygiene and health protection</div> <div>1% of collected organic waste can be treated</div> <div>20% wet waste weight as residue</div> | <div>Economic sustainability</div> <div>0 income- expenditure ratio</div> | <div>Environmental protection</div> <div>2700 kg CO<sub>2</sub> equivalent/ton</div> <div>5/5 leachate risk</div> <div>0% N recovered</div> <div>0% Phosphorus recovered</div> <div>0 kWh/ton energy produced</div> |

Scenario:

Points:

|                                                                                                                                                                                                                                                                                         |                                                                                                |                                                                                                                                                    |                                                                                  |                                                                                                                                                                                                                            |
|-----------------------------------------------------------------------------------------------------------------------------------------------------------------------------------------------------------------------------------------------------------------------------------------|------------------------------------------------------------------------------------------------|----------------------------------------------------------------------------------------------------------------------------------------------------|----------------------------------------------------------------------------------|----------------------------------------------------------------------------------------------------------------------------------------------------------------------------------------------------------------------------|
| <div></div>                                                                                                                                                                                                                                                                             |                                                                                                |                                                                                                                                                    |                                                                                  |                                                                                                                                                                                                                            |
| <div><div><b>Social Acceptance</b><br/><i>2/10 Potential hazards</i><br/><i>No bad smell 20 m far from plant</i><br/><i>8 workers/ton</i><br/><i>100% of successful past experiences</i></div></div> |                                                                                                |                                                                                                                                                    |                                                                                  |                                                                                                                                                                                                                            |
| <div><div><b>Technical reliability</b><br/><i>90 days/year downtime</i></div></div>                                                                                                                  | <div></div> | <div><b>Hygiene and health protection</b><br/><i>1% of collected organic waste can be treated</i><br/><i>20% wet waste weight as residue</i></div> | <div><b>Economic sustainability</b><br/><i>0 income- expenditure ratio</i></div> | <div><b>Environmental protection</b><br/><i>2700 kg CO<sub>2</sub> equivalent/ton</i><br/><i>5/5 leachate risk</i><br/><i>0% N recovered</i><br/><i>0% Phosphorus recovered</i><br/><i>0 kWh/ton energy produced</i></div> |

Scenario:

Points:

|                                                                                                                                                                                                                             |                                                                                                                                                                         |                                                                              |                                                                                                                                                                                                |
|-----------------------------------------------------------------------------------------------------------------------------------------------------------------------------------------------------------------------------|-------------------------------------------------------------------------------------------------------------------------------------------------------------------------|------------------------------------------------------------------------------|------------------------------------------------------------------------------------------------------------------------------------------------------------------------------------------------|
|  <div> <b>Hygiene and health protection</b><br/> 100% of collected organic waste can be treated<br/> 0% wet waste weight as residue </div> |                                                                                                                                                                         |                                                                              |                                                                                                                                                                                                |
|  <div> <b>Technical reliability</b><br/> 90 days/year downtime </div>                                                                      | <div> <b>Social Acceptance</b><br/> 10/10 Potential hazards<br/> All week bad smell 20 m far from plant<br/> 1 worker/ton<br/> 0% of successful past experiences </div> | <div> <b>Economic sustainability</b><br/> 0 income- expenditure ratio </div> | <div> <b>Environmental protection</b><br/> 2700 kg CO<sub>2</sub> equivalent/ton<br/> 5/5 leachate risk<br/> 0% N recovered<br/> 0% Phosphorus recovered<br/> 0 kWh/ton energy produced </div> |

Scenario:

Points:

|                                                                                                                                                                 |                                                                                                                                                                         |                                                                                                                                          |                                                                                                                                                                                                |
|-----------------------------------------------------------------------------------------------------------------------------------------------------------------|-------------------------------------------------------------------------------------------------------------------------------------------------------------------------|------------------------------------------------------------------------------------------------------------------------------------------|------------------------------------------------------------------------------------------------------------------------------------------------------------------------------------------------|
|  <div> <b>Economic sustainability</b><br/> 39 income- expenditure ratio </div> |                                                                                                                                                                         |                                                                                                                                          |                                                                                                                                                                                                |
|  <div> <b>Technical reliability</b><br/> 90 days/year downtime </div>         | <div> <b>Social Acceptance</b><br/> 10/10 Potential hazards<br/> All week bad smell 20 m far from plant<br/> 1 worker/ton<br/> 0% of successful past experiences </div> | <div> <b>Hygiene and health protection</b><br/> 1% of collected organic waste can be treated<br/> 20% wet waste weight as residue </div> | <div> <b>Environmental protection</b><br/> 2700 kg CO<sub>2</sub> equivalent/ton<br/> 5/5 leachate risk<br/> 0% N recovered<br/> 0% Phosphorus recovered<br/> 0 kWh/ton energy produced </div> |

Scenario:

Points:

|                                                                                                                                                                                                                                                                                        |                                                                                                                                                                         |                                                                                                                                          |                                                                              |
|----------------------------------------------------------------------------------------------------------------------------------------------------------------------------------------------------------------------------------------------------------------------------------------|-------------------------------------------------------------------------------------------------------------------------------------------------------------------------|------------------------------------------------------------------------------------------------------------------------------------------|------------------------------------------------------------------------------|
|  <div> <b>Environmental protection</b><br/> 0 kg CO<sub>2</sub> equivalent/ton<br/> 1/5 leachate risk<br/> 100% N recovered<br/> 100% Phosphorus recovered<br/> 3000 kWh/ton energy produced </div> |                                                                                                                                                                         |                                                                                                                                          |                                                                              |
|  <div> <b>Technical reliability</b><br/> 90 days/year downtime </div>                                                                                                                               | <div> <b>Social Acceptance</b><br/> 10/10 Potential hazards<br/> All week bad smell 20 m far from plant<br/> 1 worker/ton<br/> 0% of successful past experiences </div> | <div> <b>Hygiene and health protection</b><br/> 1% of collected organic waste can be treated<br/> 20% wet waste weight as residue </div> | <div> <b>Economic sustainability</b><br/> 0 income- expenditure ratio </div> |

## Sub-objectives for main objective: Social acceptance

Worst Scenario:

Points:

|                                                                                   |                                                         |                                                                     |                                            |                                                                      |
|-----------------------------------------------------------------------------------|---------------------------------------------------------|---------------------------------------------------------------------|--------------------------------------------|----------------------------------------------------------------------|
|  |                                                         |                                                                     |                                            |                                                                      |
|  | <b>Working safety</b><br><i>10/10 potential hazards</i> | <b>Smell impact</b><br><i>All week bad smell 20m far from plant</i> | <b>Job creation</b><br><i>1 worker/ton</i> | <b>Trust in technology</b><br><i>0 % successful past experiences</i> |

0

Scenario:

Points:

|                                                                                   |                                                        |                                                                     |                                            |                                                                      |
|-----------------------------------------------------------------------------------|--------------------------------------------------------|---------------------------------------------------------------------|--------------------------------------------|----------------------------------------------------------------------|
|  | <b>Working safety</b><br><i>2/10 potential hazards</i> |                                                                     |                                            |                                                                      |
|  | ↑                                                      | <b>Smell impact</b><br><i>All week bad smell 20m far from plant</i> | <b>Job creation</b><br><i>1 worker/ton</i> | <b>Trust in technology</b><br><i>0 % successful past experiences</i> |

|                                                                                     |                                                         |                                                               |                                            |                                                                      |
|-------------------------------------------------------------------------------------|---------------------------------------------------------|---------------------------------------------------------------|--------------------------------------------|----------------------------------------------------------------------|
|   |                                                         | <b>Smell impact</b><br><i>No bad smell 20m far from plant</i> |                                            |                                                                      |
|  | <b>Working safety</b><br><i>10/10 potential hazards</i> | ↑                                                             | <b>Job creation</b><br><i>1 worker/ton</i> | <b>Trust in technology</b><br><i>0 % successful past experiences</i> |

Scenario:

Points:

|                                                                                     |                                                         |                                                                     |                                             |                                                                      |
|-------------------------------------------------------------------------------------|---------------------------------------------------------|---------------------------------------------------------------------|---------------------------------------------|----------------------------------------------------------------------|
|  |                                                         |                                                                     | <b>Job creation</b><br><i>8 workers/ton</i> |                                                                      |
|  | <b>Working safety</b><br><i>10/10 potential hazards</i> | <b>Smell impact</b><br><i>All week bad smell 20m far from plant</i> | ↑                                           | <b>Trust in technology</b><br><i>0 % successful past experiences</i> |

Scenario:

Points:

|                                                                                     |                                                         |                                                                     |                                            |                                                                       |
|-------------------------------------------------------------------------------------|---------------------------------------------------------|---------------------------------------------------------------------|--------------------------------------------|-----------------------------------------------------------------------|
|  |                                                         |                                                                     |                                            | <b>Trust in technology</b><br><i>100% successful past experiences</i> |
|  | <b>Working safety</b><br><i>10/10 potential hazards</i> | <b>Smell impact</b><br><i>All week bad smell 20m far from plant</i> | <b>Job creation</b><br><i>1 worker/ton</i> | ↑                                                                     |

## Sub-objectives for (main) objective: High hygiene and health protection

Worst Scenario:

Points:

|                                                                                   |                                                                              |                                                             |
|-----------------------------------------------------------------------------------|------------------------------------------------------------------------------|-------------------------------------------------------------|
|  |                                                                              |                                                             |
|  | <b>Processing capacity</b><br><i>1% of organic waste collected treatable</i> | <b>Residue generation</b><br><i>20% of waste as residue</i> |

0

Scenario:

Points:

|                                                                                   |                                                                                   |                                                             |
|-----------------------------------------------------------------------------------|-----------------------------------------------------------------------------------|-------------------------------------------------------------|
|  | <b>Processing capacity</b><br><i>100% of organic waste collected treatable</i>    |                                                             |
|  |  | <b>Residue generation</b><br><i>20% of waste as residue</i> |

Scenario:

Points:

|                                                                                     |                                                                              |                                                                                       |
|-------------------------------------------------------------------------------------|------------------------------------------------------------------------------|---------------------------------------------------------------------------------------|
|   |                                                                              | <b>Residue generation</b><br><i>0% of waste as residue</i>                            |
|  | <b>Processing capacity</b><br><i>1% of organic waste collected treatable</i> |  |

## Sub-objectives for (main) objective: High environmental protection

Worst Scenario:

Points:

|                                                                                     |                                                                                                        |                                                                                                                         |
|-------------------------------------------------------------------------------------|--------------------------------------------------------------------------------------------------------|-------------------------------------------------------------------------------------------------------------------------|
|  |                                                                                                        |                                                                                                                         |
|  | <b>Environmental pollution</b><br><i>2700 kg CO<sub>2</sub> equivalent</i><br><i>5/5 leachate risk</i> | <b>Resource recovery</b><br><i>0% N recovered</i><br><i>0% Phosphorus recovered</i><br><i>0 kWh/ton energy produced</i> |

0

Scenario:

Points:

|                                                                                     |                                                                                                     |                                                                                                                         |
|-------------------------------------------------------------------------------------|-----------------------------------------------------------------------------------------------------|-------------------------------------------------------------------------------------------------------------------------|
|  | <b>Environmental pollution</b><br><i>0 kg CO<sub>2</sub> equivalent</i><br><i>1/5 leachate risk</i> |                                                                                                                         |
|  |                  | <b>Resource recovery</b><br><i>0% N recovered</i><br><i>0% Phosphorus recovered</i><br><i>0 kWh/ton energy produced</i> |

Scenario:

|                                                                                   |                                                                                                           |
|-----------------------------------------------------------------------------------|-----------------------------------------------------------------------------------------------------------|
|  | <b>Resource recovery</b><br>100% N recovered<br>100% Phosphorus recovered<br>3000 kWh/ton energy produced |
|  | <b>Environmental pollution</b><br>2700 kg CO <sub>2</sub> equivalent<br>5/5 leachate risk                 |

Points:

**Table S2.** The Reverse Swing Questionnaire: points given to each scenario were used in the calculation of the stakeholder's preference weight for the objective pointed by an arrow in the respective scenario.

### SELECTING ORGANIC WASTE TREATMENT TECHNOLOGY FOR LIMBE MARKET

|                             |              |                                         |
|-----------------------------|--------------|-----------------------------------------|
| <b>Reverse Swing-Method</b> | Name:        | Interviewer: <b>Wrixon Mpanang'ombe</b> |
|                             | Stakeholder: | Date:                                   |

**Best Scenario:**

Points:

|                                                                                     |                                                      |                                                                                                                                                   |                                                                                                                          |                                                               |                                                                                                                                                                              |
|-------------------------------------------------------------------------------------|------------------------------------------------------|---------------------------------------------------------------------------------------------------------------------------------------------------|--------------------------------------------------------------------------------------------------------------------------|---------------------------------------------------------------|------------------------------------------------------------------------------------------------------------------------------------------------------------------------------|
|                                                                                     | <b>Technical reliability</b><br>0 days/year downtime | <b>Social Acceptance</b><br>2/10 Potential hazards<br>No bad smell 20 m far from plant<br>8 of workers/ton<br>100% of successful past experiences | <b>Hygiene and health protection</b><br>100% of collected organic waste can be treated<br>0% wet waste weight as residue | <b>Economic sustainability</b><br>39 Income-expenditure ratio | <b>Environmental protection</b><br>0 kg CO <sub>2</sub> equivalent/ton<br>1/5 leachate risk<br>100% N recovered<br>100% Phosphorus recovered<br>3000 kWh/ton energy produced |
|  |                                                      |                                                                                                                                                   |                                                                                                                          |                                                               |                                                                                                                                                                              |
|  |                                                      |                                                                                                                                                   |                                                                                                                          |                                                               |                                                                                                                                                                              |

100

Scenario:

Points:

|                                                                                     |                                                                                                                                                |                                                                                                                          |                                                               |                                                                                                                                                                              |
|-------------------------------------------------------------------------------------|------------------------------------------------------------------------------------------------------------------------------------------------|--------------------------------------------------------------------------------------------------------------------------|---------------------------------------------------------------|------------------------------------------------------------------------------------------------------------------------------------------------------------------------------|
|                                                                                     | <b>Social Acceptance</b><br>2/10 Potential hazards<br>No bad smell 20 m far from plant<br>8 workers/ton<br>100% of successful past experiences | <b>Hygiene and health protection</b><br>100% of collected organic waste can be treated<br>0% wet waste weight as residue | <b>Economic sustainability</b><br>39 Income-expenditure ratio | <b>Environmental protection</b><br>0 kg CO <sub>2</sub> equivalent/ton<br>1/5 leachate risk<br>100% N recovered<br>100% Phosphorus recovered<br>3000 kWh/ton energy produced |
|  |                                                                                                                                                |                                                                                                                          |                                                               |                                                                                                                                                                              |
|  | <b>Technical reliability</b><br>90 days/year downtime                                                                                          |                                                                                                                          |                                                               |                                                                                                                                                                              |

Scenario:

Points:

|                                                                                   |                                                                                                                                                                                |                                                                                   |                                                                                                                                        |                                                                      |                                                                                                                                                                                                                |
|-----------------------------------------------------------------------------------|--------------------------------------------------------------------------------------------------------------------------------------------------------------------------------|-----------------------------------------------------------------------------------|----------------------------------------------------------------------------------------------------------------------------------------|----------------------------------------------------------------------|----------------------------------------------------------------------------------------------------------------------------------------------------------------------------------------------------------------|
|  | <b>Technical reliability</b><br><i>0 days/year downtime</i>                                                                                                                    |  | <b>Hygiene and health protection</b><br><i>100% of collected organic waste can be treated</i><br><i>0% wet waste weight as residue</i> | <b>Economic sustainability</b><br><i>39 Income-expenditure ratio</i> | <b>Environmental protection</b><br><i>0 kg CO<sub>2</sub> equivalent/ton</i><br><i>1/5 leachate risk</i><br><i>100% N recovered</i><br><i>100% Phosphorus recovered</i><br><i>3000 kWh/ton energy produced</i> |
|                                                                                   | <b>Social Acceptance</b><br><i>10/10 Potential hazards</i><br><i>All week bad smell 20 m far from plant</i><br><i>1 worker/ton</i><br><i>0% of successful past experiences</i> |                                                                                   |                                                                                                                                        |                                                                      |                                                                                                                                                                                                                |

Scenario:

Points:

|                                                                                   |                                                             |                                                                                                                                                                            |                                                                                    |                                                                                                                                        |                                                                                                                                                                                                                |
|-----------------------------------------------------------------------------------|-------------------------------------------------------------|----------------------------------------------------------------------------------------------------------------------------------------------------------------------------|------------------------------------------------------------------------------------|----------------------------------------------------------------------------------------------------------------------------------------|----------------------------------------------------------------------------------------------------------------------------------------------------------------------------------------------------------------|
|  | <b>Technical reliability</b><br><i>0 days/year downtime</i> | <b>Social Acceptance</b><br><i>2/10 Potential hazards</i><br><i>No bad smell 20 m far from plant</i><br><i>8 workers/ton</i><br><i>100% of successful past experiences</i> |  | <b>Economic sustainability</b><br><i>39 Income-expenditure ratio</i>                                                                   | <b>Environmental protection</b><br><i>0 kg CO<sub>2</sub> equivalent/ton</i><br><i>1/5 leachate risk</i><br><i>100% N recovered</i><br><i>100% Phosphorus recovered</i><br><i>3000 kWh/ton energy produced</i> |
|                                                                                   |                                                             |                                                                                                                                                                            |                                                                                    | <b>Hygiene and health protection</b><br><i>1% of collected organic waste can be treated</i><br><i>20% wet waste weight as residues</i> |                                                                                                                                                                                                                |

Scenario:

Points:

|                                                                                     |                                                             |                                                                                                                                                                            |                                                                                                                                         |                                                                                       |                                                                                                                                                                                                                |
|-------------------------------------------------------------------------------------|-------------------------------------------------------------|----------------------------------------------------------------------------------------------------------------------------------------------------------------------------|-----------------------------------------------------------------------------------------------------------------------------------------|---------------------------------------------------------------------------------------|----------------------------------------------------------------------------------------------------------------------------------------------------------------------------------------------------------------|
|  | <b>Technical reliability</b><br><i>0 days/year downtime</i> | <b>Social Acceptance</b><br><i>2/10 Potential hazards</i><br><i>No bad smell 20 m far from plant</i><br><i>8 workers/ton</i><br><i>100% of successful past experiences</i> | <b>Hygiene and health protection</b><br><i>100% of collected organic waste can be treated</i><br><i>0% wet waste weight as residues</i> |  | <b>Environmental protection</b><br><i>0 kg CO<sub>2</sub> equivalent/ton</i><br><i>1/5 leachate risk</i><br><i>100% N recovered</i><br><i>100% Phosphorus recovered</i><br><i>3000 kWh/ton energy produced</i> |
|                                                                                     |                                                             |                                                                                                                                                                            |                                                                                                                                         |                                                                                       | <b>Economic sustainability</b><br><i>0 Income-expenditure ratio</i>                                                                                                                                            |

Scenario:

Points:

|                                                                                   |                              |                                                                                                                    |                                                                                   |                                |                                                                                                                                       |
|-----------------------------------------------------------------------------------|------------------------------|--------------------------------------------------------------------------------------------------------------------|-----------------------------------------------------------------------------------|--------------------------------|---------------------------------------------------------------------------------------------------------------------------------------|
|  | <b>Technical reliability</b> | <b>Social Acceptance</b>                                                                                           | <b>Hygiene and health protection</b>                                              | <b>Economic sustainability</b> |                                                    |
|                                                                                   | 0 days/year downtime         | 2/10 Potential hazards<br>No bad smell 20 m far from plant<br>8 workers/ton<br>100% of successful past experiences | 100% of collected organic waste can be treated<br>0% wet waste weight as residues | 39 Income-expenditure ratio    |                                                                                                                                       |
|  |                              |                                                                                                                    |                                                                                   |                                | <b>Environmental protection</b>                                                                                                       |
|                                                                                   |                              |                                                                                                                    |                                                                                   |                                | 2700 kg CO <sub>2</sub> equivalent/ton<br>5/5 leachate risk<br>0% N recovered<br>0% Phosphorus recovered<br>0 kWh/ton energy produced |

Sub-objectives for main objective: Social acceptance

Best Scenario:

Points:

|                                                                                     |                                                                                     |                                                                |                                             |                                                                          |
|-------------------------------------------------------------------------------------|-------------------------------------------------------------------------------------|----------------------------------------------------------------|---------------------------------------------|--------------------------------------------------------------------------|
|  | <b>Working safety</b><br><i>2/10 potential hazards</i>                              | <b>Smell impact</b><br><i>No bad smell 20 m far from plant</i> | <b>Job creation</b><br><i>8 workers/ton</i> | <b>Trust in technology</b><br><i>100% of successful past experiences</i> |
|                                                                                     |  |                                                                |                                             |                                                                          |

100

Scenario:

Points:

|                                                                                     |                                                                                     |                                                                |                                             |                                                                          |
|-------------------------------------------------------------------------------------|-------------------------------------------------------------------------------------|----------------------------------------------------------------|---------------------------------------------|--------------------------------------------------------------------------|
|  |  | <b>Smell impact</b><br><i>No bad smell 20 m far from plant</i> | <b>Job creation</b><br><i>8 workers/ton</i> | <b>Trust in technology</b><br><i>100% of successful past experiences</i> |
|  | <b>Working safety</b><br><i>10/10 potential hazards</i>                             |                                                                |                                             |                                                                          |

|                                                                                   |                                                                      |                                                                                   |                                             |                                                                          |  |
|-----------------------------------------------------------------------------------|----------------------------------------------------------------------|-----------------------------------------------------------------------------------|---------------------------------------------|--------------------------------------------------------------------------|--|
|  | <b>Working safety</b><br><i>2/10 potential hazards</i>               |  | <b>Job creation</b><br><i>8 workers/ton</i> | <b>Trust in technology</b><br><i>100% of successful past experiences</i> |  |
|  | <b>Smell impact</b><br><i>All week bad smell 20 m far from plant</i> |                                                                                   |                                             |                                                                          |  |

Scenario:

Points:

|                                                                                   |                                                        |                                                                |                                                                                   |                                                                   |  |
|-----------------------------------------------------------------------------------|--------------------------------------------------------|----------------------------------------------------------------|-----------------------------------------------------------------------------------|-------------------------------------------------------------------|--|
|  | <b>Working safety</b><br><i>2/10 potential hazards</i> | <b>Smell impact</b><br><i>No bad smell 20 m far from plant</i> |  | <b>Trust in technology</b><br><i>100% successful applications</i> |  |
|  | <b>Job creation</b><br><i>1 worker/ton</i>             |                                                                |                                                                                   |                                                                   |  |

Scenario:

Points:

|                                                                                    |                                                                        |                                                                |                                             |                                                                                     |  |
|------------------------------------------------------------------------------------|------------------------------------------------------------------------|----------------------------------------------------------------|---------------------------------------------|-------------------------------------------------------------------------------------|--|
|   | <b>Working safety</b><br><i>2/10 potential hazards</i>                 | <b>Smell impact</b><br><i>No bad smell 20 m far from plant</i> | <b>Job creation</b><br><i>8 workers/ton</i> |  |  |
|  | <b>Trust in technology</b><br><i>0% of successful past experiences</i> |                                                                |                                             |                                                                                     |  |

Sub-objectives for (main) objective: High hygiene and health protection

**Best Scenario:**

Points:

|                                                                                     |                                                                      |                                                                 |     |
|-------------------------------------------------------------------------------------|----------------------------------------------------------------------|-----------------------------------------------------------------|-----|
|  | <b>Processing capacity</b><br><i>100% of organic waste treatable</i> | <b>Sub-product generation</b><br><i>0% of waste as residues</i> | 100 |
|  |                                                                      |                                                                 |     |

Scenario:

Points:

|                                                                                     |                                                                                     |                                                                 |  |
|-------------------------------------------------------------------------------------|-------------------------------------------------------------------------------------|-----------------------------------------------------------------|--|
|  |  | <b>Sub-product generation</b><br><i>0% of waste as residues</i> |  |
|  | <b>High Processing capacity</b><br><i>1% of organic waste treatable</i>             |                                                                 |  |

Scenario:

Points:

|                                                                                     |                                                                      |                                                                                       |  |
|-------------------------------------------------------------------------------------|----------------------------------------------------------------------|---------------------------------------------------------------------------------------|--|
|  | <b>Processing capacity</b><br><i>100% of organic waste treatable</i> |  |  |
|  | <b>Low residue generation</b><br><i>20% of waste as residues</i>     |                                                                                       |  |



Sub-objectives for (main) objective: High environmental protection

Best Scenario:

Points:

|                                                                                   |                                                                                                     |                                                                                                                            |
|-----------------------------------------------------------------------------------|-----------------------------------------------------------------------------------------------------|----------------------------------------------------------------------------------------------------------------------------|
|  | <b>Environmental pollution</b><br><i>0 kg CO<sub>2</sub> equivalent</i><br><i>1/5 leachate risk</i> | <b>Resource recovery</b><br><i>100% N recovered</i><br><i>100% Phosphorus recovered</i><br><i>3000 kWh energy produced</i> |
|  |                                                                                                     |                                                                                                                            |

100

Scenario:

Points:

|                                                                                   |                                                                                                        |                                                                                                                                |
|-----------------------------------------------------------------------------------|--------------------------------------------------------------------------------------------------------|--------------------------------------------------------------------------------------------------------------------------------|
|  |                       | <b>Resource recovery</b><br><i>100% N recovered</i><br><i>100% Phosphorus recovered</i><br><i>3000 kWh energy produced/ton</i> |
|  | <b>Environmental pollution</b><br><i>2700 kg CO<sub>2</sub> equivalent</i><br><i>5/5 leachate risk</i> |                                                                                                                                |

Scenario:

Points:

|                                                                                     |                                                                                                     |                                                                                                                         |
|-------------------------------------------------------------------------------------|-----------------------------------------------------------------------------------------------------|-------------------------------------------------------------------------------------------------------------------------|
|  | <b>Environmental pollution</b><br><i>0 kg CO<sub>2</sub> equivalent</i><br><i>1/5 leachate risk</i> |                                    |
|  |                                                                                                     | <b>Resource recovery</b><br><i>0% N recovered</i><br><i>0% Phosphorus recovered</i><br><i>0 kWh energy produced/ton</i> |
